# Supplementary material
Source: PubMed Central journal article supplement (PMC6942880)
Supplement: NIHMS1060596-supplement-Supplementary.pdf [file NIHMS1060596-supplement-Supplementary.pdf]

1 **Supplemental Material**

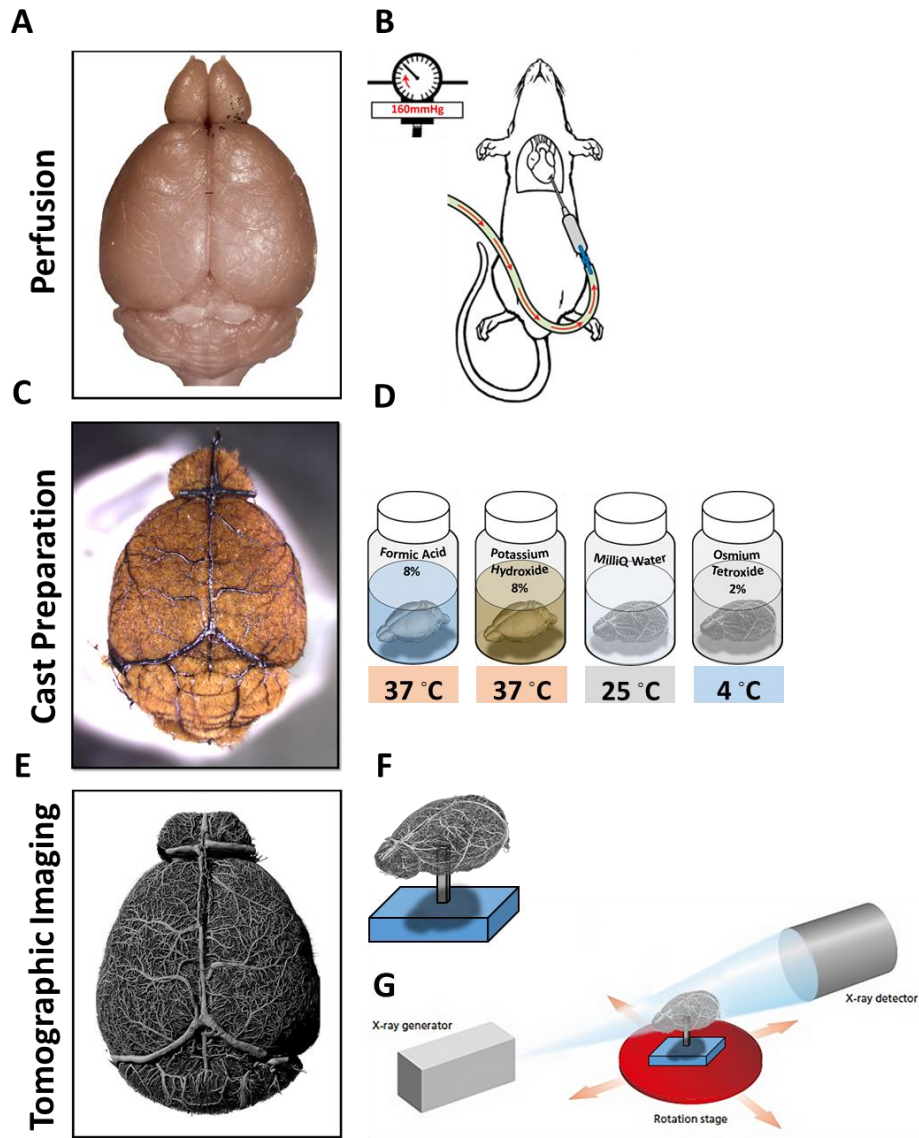

2

3 **Supplemental Figure 1: Workflow of the procedure used to produce the cerebrovascular**  
4 **corrosion casts.** (A) Perfusion of the adult mouse brain. (B) Transcardial perfusion via cannulated  
5 ascending aorta of the eluate, fixative, and casting resin at 160 mmHg. (C) Preprocessing of the  
6 vascular corrosion cast. (D) Decalcification, maceration, washing, and osmium embedding of the  
7 vascular corrosion casts. (E) Processing of the vascular corrosion cast for tomographic imaging.

8 (F) Mounting and positioning of vascular cast on pedestals. (G) Setup of Image acquisition routine  
9 for  $\mu$  computerized tomographic imaging of vascular corrosion cast.

10

11

12

13

14

15

16

17

18

19

20

21

22

23

24

25

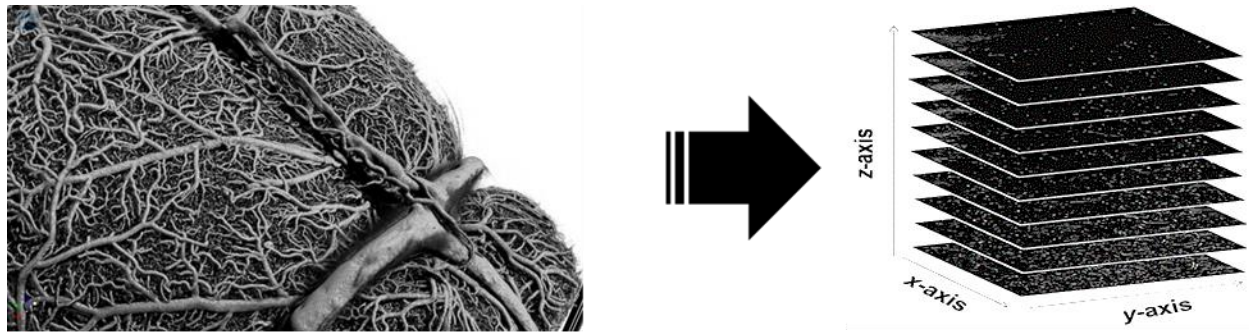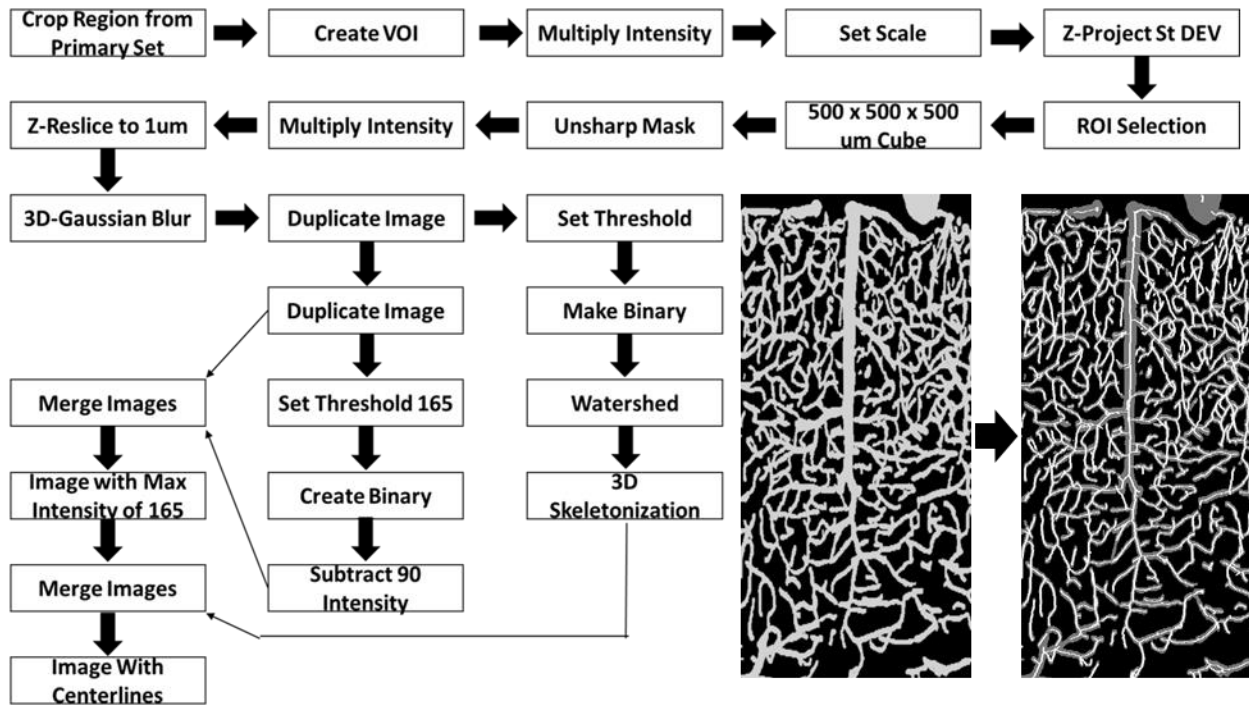

26

27 **Supplemental Figure 2: Process flow diagram for brain vascular subregion optimization by**  
 28 **segmentation and centerline insertion.** Specific brain subregions were isolated into separate VOI  
 29 image sets by 3-dimensional cropping of the primary data set. The intensity of each VOI data set  
 30 was normalized to the average intensity of all VOIs by arithmetic adjustment. Standard deviation  
 31 intensity projection of the image series was created to aid in the co-registration of the data set to a  
 32 specified orientation. The final co-registered image series produced a 500 x 500 x 500 um VOI  
 33 readjusted to a pixel size of 1um. The VOI data set was duplicated to produce three identical sub-  
 34 blocks. The first sub-block was converted into a binary image series then used to extract the

35 centerlines of vessels. The second sub-block served as a mask to subtract the intensity of all regions  
36 above 165 in the third sub-block. Finally, the centerlines of the first sub-block is merged with the  
37 third sub-block producing an image series with centerlines having a pixel intensity of 255 and  
38 vascular structures with a pixel intensity  $< 165$ .

39

40

41

42

43

44

45

46

47

48

49

50

51

52

53

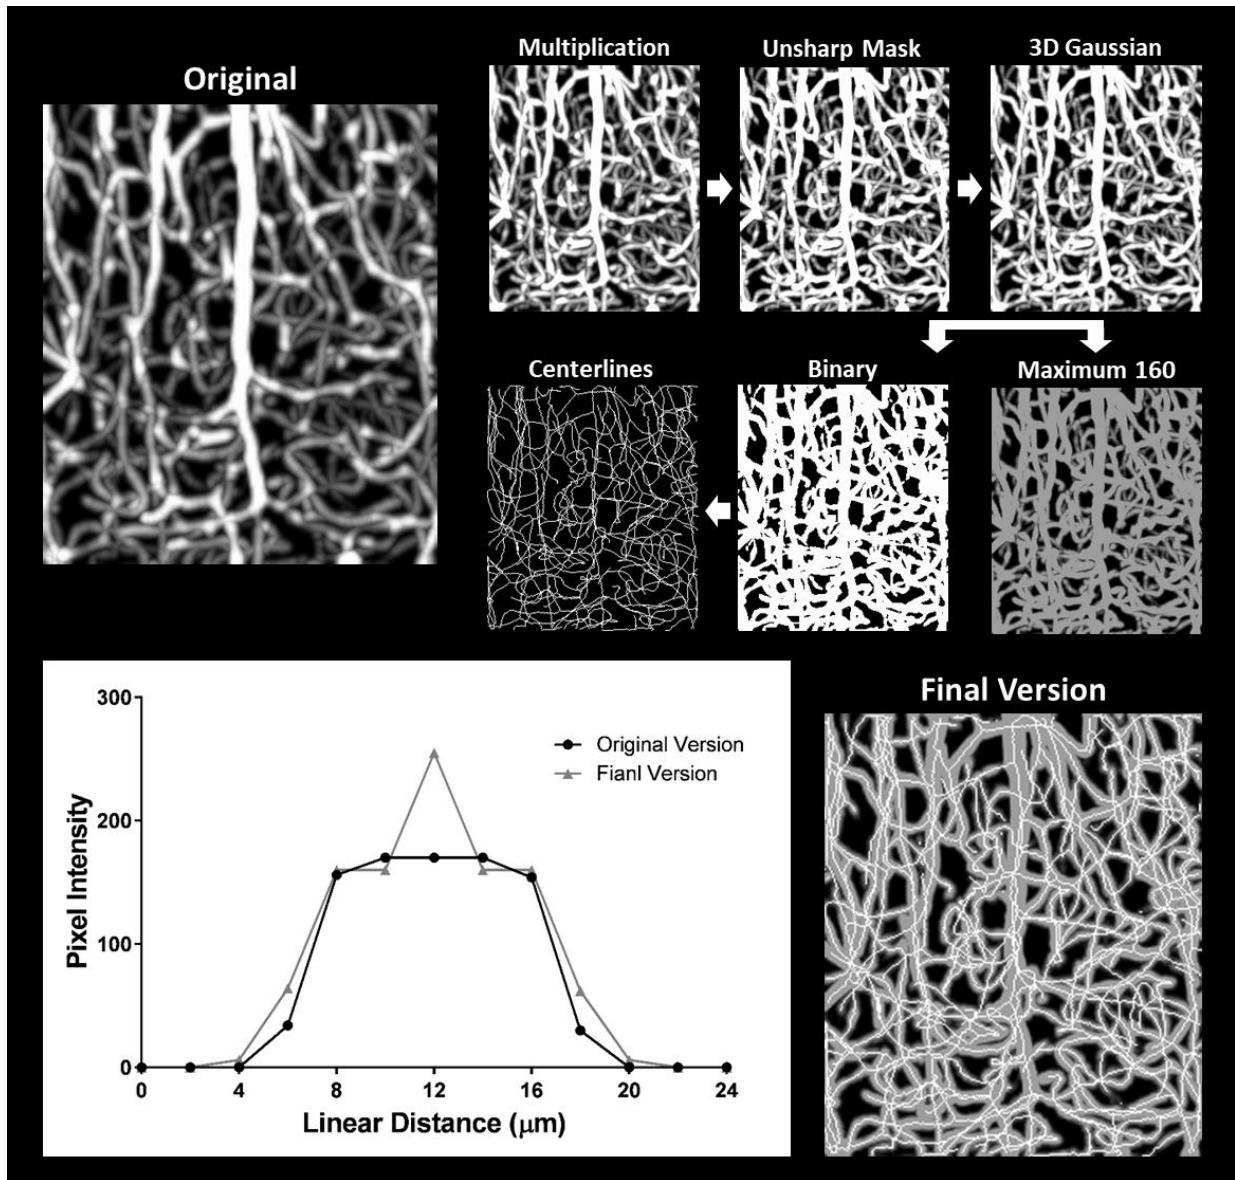

55

56 **Supplemental Figure 3: The post-processing of image data sets causes no artifactual**  
 57 **alterations to vessel diameter or destruction of the native network architecture.** The  
 58 maximum intensity projection of a data set depicting cortical vessels after post-processing of an  
 59 image by multiplication, unsharp mask, 3D Gaussian filter, maximum pixel intensity cutoff,  
 60 binarization, centerline extraction and final image composition. Line graph demonstrating the

61 linear pixel intensity profile (y-axis) across the entire diameter (x-axis) of a vessel before (black  
62 circles) and after the post-processing (gray triangle) of image data. The final version of the data  
63 set contains centerlines at a maximum pixel intensity of 255 while non-centerline pixel intensities  
64 are cut off at a maximum of 160.

65

66

67

68

69

70

71

72

73

74

75

76

77

78

79

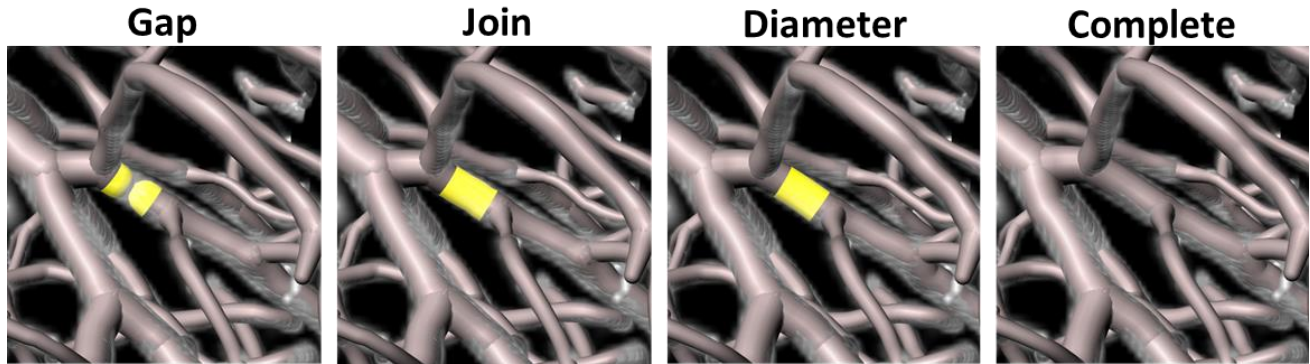

80

81 **Supplemental Figure 4: Manual error corrections following an automated filament trace**  
82 **function.** Depiction of an erroneous gap (first panel, yellow) after automated filament tracing  
83 resolved by manually joining (second panel) the segment together followed by recalculating the  
84 diameter of the new portion of segment (third panel, yellow) from the image data set. Final version  
85 of a vessel filament that was manually corrected for a gap-error (fourth panel) that appeared  
86 following the automated filament trace function.

87

88

89

90

91

92

93

94

95

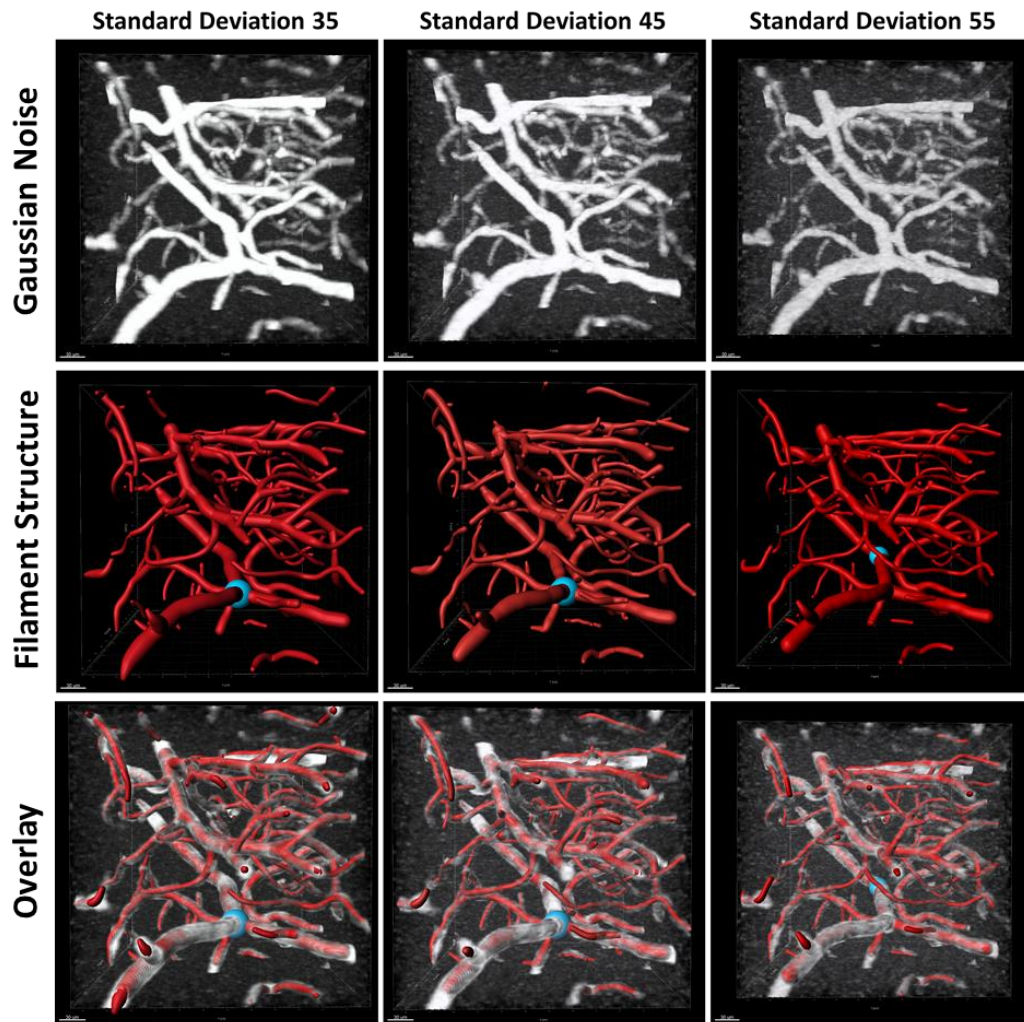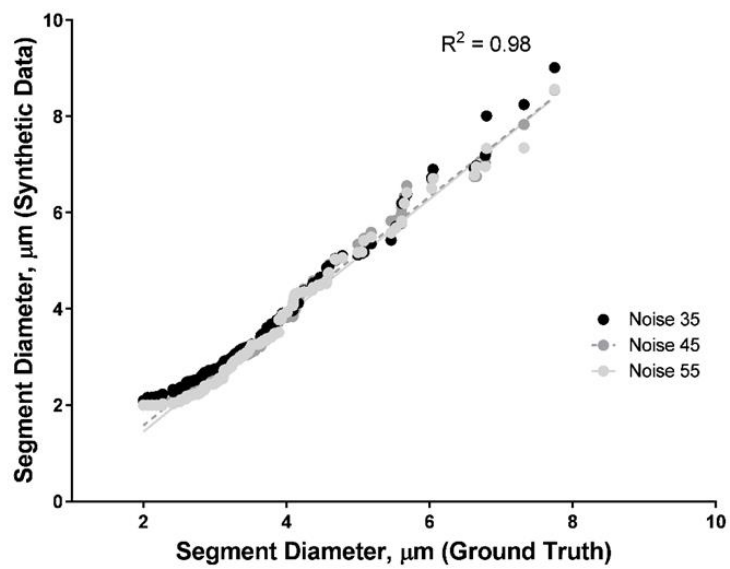



98

99 **Supplemental Figure 5: Effect of image noise on the three-dimensional vascular network**

100 **reconstruction and analysis.** Gaussian noise (top row) at a standard deviation of 35, 45, or 55,  
101 was artificially introduced into a 250 x 250 x 250  $\mu\text{m}^3$  data set. The quality of the generated  
102 filament structures (middle row) from each of the data sets was inspected. The specific positioning  
103 of the reconstructed filaments for each data set can be seen by overlay (bottom row). (A) Scatter  
104 plot of the measured filament diameters from each data set containing elevated Gaussian noise as  
105 a function to the filament diameters of the manually segmented and manually traced data set.  
106 Linear trend indicates agreement between the measured filament diameters.  $R^2$  value indicates the  
107 strength of fit to the linear model.

108

109

110

111

112

113

114

115

116

117

## Image Post-Processing

| Function              | Parameter(s)                         | Image Adjustment                                                                                             |
|-----------------------|--------------------------------------|--------------------------------------------------------------------------------------------------------------|
| Multiplication        | Image = Image x 1.5                  | Used to shift up the average intensity of the original data set for thresholding.                            |
| Gaussian Filter       | Sigma = 0.65 pixels                  | Convolution with Gaussian function. Smooths intensity of structures to aid in thresholding for binarization. |
| Unsharp Mask          | Sigma = 1 pixel / Mask Weight = 0.06 | Enhances local contrast to increase spatial resolvability.                                                   |
| Binarization          | Moments Algorithm                    | To convert the 8-bit gray scale data set into a binary data set.                                             |
| Centerline Extraction | 3D Extraction from Binary Image      | Used to obtain the center most pixel along the vessel structure's length in 3D space.                        |
| Maximum (Image Math)  | Pixel I = Pixel I - (Pixel I - 160)  | No pixel above 160. Primes image for centerline insertion at an intensity of 255. Only centerlines at 255.   |

Supplemental Table 1. Image post-processing functions used to optimize data sets prior to analysis. Multiplication: global pixel arithmetic; Gaussian Filter: convolving filter; Unsharp Mask: sharpen filter; Binarization: image format transformation; Centerline Extraction: morphological function; Maximum: global pixel arithmetic.

119

120

121

122

123

124

125

126

127

128

129

130

131

|                                                                | Female               |                      | Male                 |                      | P-value | Units                             |
|----------------------------------------------------------------|----------------------|----------------------|----------------------|----------------------|---------|-----------------------------------|
|                                                                | Value                | SEM                  | Value                | SEM                  |         |                                   |
| Age                                                            | 3.0                  | 0                    | 3.0                  | 0                    | n.r     | Months                            |
| Weight                                                         | 30                   | 0.5                  | 30                   | 0.5                  | 0.489   | Grams                             |
| Temperature                                                    | 36                   | 0.1                  | 36                   | 0.1                  | 0.125   | C°                                |
| Systolic Blood Pressure                                        | 164                  | 0.1                  | 165                  | 0.1                  | 0.004   | mmHg                              |
| Diastolic Blood Pressure                                       | 142                  | 0.2                  | 140                  | 0.4                  | 0.027   | mmHg                              |
| Mean Arterial Pressure                                         | 149                  | 0.2                  | 148                  | 0.3                  | 0.057   | mmHg                              |
| <b>Whold Brain Analysis</b>                                    |                      |                      |                      |                      |         |                                   |
| Vessel Diameter Range                                          | 2 - 220              | -                    | 2 - 220              | -                    | n.r.    | µm                                |
| Mean Diameter                                                  | 36.6                 | 2.4                  | 54.3                 | 10.6                 | 0.095   | µm                                |
| Number of Vessels                                              | 1.4x10 <sup>6</sup>  | 2.6x10 <sup>5</sup>  | 1.8x10 <sup>6</sup>  | 3.0x10 <sup>5</sup>  | 0.154   | Segments                          |
| Intervessel Distance                                           | 20                   | 5                    | 32                   | 13                   | 0.037   | µm                                |
| Total Vascular Volume                                          | 2.2x10 <sup>10</sup> | 4.0x10 <sup>9</sup>  | 1.3x10 <sup>10</sup> | 1.7x10 <sup>9</sup>  | 0.053   | µm <sup>3</sup>                   |
| Total Parenchymal Volume                                       | 1.5x10 <sup>11</sup> | 5.1x10 <sup>10</sup> | 4.7x10 <sup>10</sup> | 1.7x10 <sup>10</sup> | 0.065   | µm <sup>3</sup>                   |
| Parenchymal Volume (% Brain Volume)                            | 76.7                 | 6.6                  | 62.3                 | 8.7                  | 0.111   | %                                 |
| Vascular Surface Area                                          | 5.5x10 <sup>9</sup>  | 1.1x10 <sup>9</sup>  | 3.2x10 <sup>9</sup>  | 6.2x10 <sup>8</sup>  | 0.075   | µm <sup>2</sup>                   |
| Vessel Surface Area / Vessel Volume                            | 0.24                 | 0.01                 | 0.23                 | 0.01                 | 0.368   | 1 / µm                            |
| Vessel Population < 15 µm                                      | 50                   | 6                    | 40                   | 3                    | 0.084   | % of Total                        |
| Vessel Population 20-80 µm                                     | 36.3                 | 3                    | 49                   | 3                    | 0.01    | % of Total                        |
| BBB Interface (SA <sub>c</sub> / V <sub>p</sub> )              | 17.8                 | 3.2                  | 17.8                 | 3.2                  | n.r.    | mm <sup>2</sup> / mm <sup>3</sup> |
| Euler Number                                                   | 1.1x10 <sup>6</sup>  | 3.7x10 <sup>5</sup>  | 1.7x10 <sup>6</sup>  | 2.4x10 <sup>5</sup>  | 0.11    | Connections                       |
| Connectivity Value (Redundancy)                                | 5.2x10 <sup>5</sup>  | 2.2x10 <sup>5</sup>  | 1.2x10 <sup>5</sup>  | 6.2x10 <sup>4</sup>  | 0.088   | Cuts                              |
| Connective Density                                             | 4.2x10 <sup>-5</sup> | 8.0x10 <sup>-6</sup> | 3.7x10 <sup>-5</sup> | 4.7x10 <sup>-6</sup> | 0.333   | 1 / µm <sup>3</sup>               |
| Fractal Dimension                                              | 2.6                  | 0.05                 | 2.5                  | 0.06                 | 0.052   |                                   |
| <b>Region Specific Analysis (Primary Somatosensory Cortex)</b> |                      |                      |                      |                      |         |                                   |
| Number of Vessels                                              | 660                  | 54                   | 468                  | 107                  | 0.071   | Segments                          |
| Mean Diameter                                                  | 14.76                | 0.22                 | 14.37                | 0.31                 | 0.175   | µm                                |
| Vascular Surface Area                                          | 5.3x10 <sup>6</sup>  | 5.5x10 <sup>5</sup>  | 4.5x10 <sup>6</sup>  | 3.3x10 <sup>5</sup>  | 0.154   | µm <sup>2</sup>                   |
| Total Vascular Volume                                          | 1.7x10 <sup>7</sup>  | 2.1x10 <sup>6</sup>  | 1.4x10 <sup>7</sup>  | 1.4x10 <sup>6</sup>  | 0.164   | µm <sup>3</sup>                   |
| Total Parenchymal Volume                                       | 1.0x10 <sup>8</sup>  | 2.1x10 <sup>6</sup>  | 1.1x10 <sup>8</sup>  | 1.4x10 <sup>6</sup>  | 0.164   | µm <sup>3</sup>                   |
| Intervessel Distance                                           | 38.6                 | 2.4                  | 43.1                 | 1.5                  | 0.1     | µm                                |
| Volume of Vessels 15 µm                                        | 6.5x10 <sup>6</sup>  | 1.2x10 <sup>6</sup>  | 3.8x10 <sup>6</sup>  | 7.7x10 <sup>5</sup>  | 0.01    | µm <sup>3</sup>                   |
| Parenchymal Zones < 15 µm                                      | 3.2x10 <sup>4</sup>  | 6.5x10 <sup>3</sup>  | 2.4x10 <sup>4</sup>  | 2.7x10 <sup>3</sup>  | n.r.    | Count                             |
| Parenchymal Zones > 15 µm                                      | 3.6x10 <sup>5</sup>  | 3.0x10 <sup>4</sup>  | 2.5x10 <sup>5</sup>  | 3.6x10 <sup>4</sup>  | 0.04    | Count                             |
| Network Composition, Vessels 6 µm                              | 1835                 | 490                  | 1082                 | 102                  | 0.01    | Segments                          |
| Euler Number                                                   | 361                  | 67                   | 226                  | 142                  | 0.18    | Connections                       |
| Connectivity Value (Redundancy)                                | 587                  | 134                  | 366                  | 95                   | 0.14    | Cuts                              |

Supplemental Table 2. Analysis of the whole brain cerebrovasculature and in the somatosensory cortex in female and male mice. Not reported = n.r..
